# Supplementary material for: Particle size specific distribution of perfluoro alkyl substances in atmospheric particulate matter in Asian cities
Source: Royal Society of Chemistry journal article supplement (doi:10.1039/c6em00564k), 2017-01-01
Supplement: c6em00564k1.pdf [file c6em00564k1.pdf]

## Supporting information

Native standards used in the present study are listed in Table S1. 8:2 FTUCA were from Asahi Glass Co. Ltd. (Tokyo, Japan). PFPrA were from Daikin Industries (Osaka, Japan). PFAC-MXB (mixture of PFBS, PFHxS, PFOS, PFDS, PFBA, PFPeA, PFHxA, PFHpA, PFOA, PFNA, PFDA, PFUnDA, PFDoDA, PFTrDA, PFTeDA, PFHxDA and PFOcDA) and other individual native standards were from Wellington Laboratories Inc. (Guelph Ontario, Canada) as mixture in methanol/water (< 1 %). The purity of all perfluoroalkyl carboxylates and sulfonates have between 95 % and 98 %.

**Table S1** Native standards used in the present study.

| Name                                                    | Acronym           |
|---------------------------------------------------------|-------------------|
| Sodium perfluoro-1-ethanesulfonate                      | PFEtS             |
| Sodium perfluoro-1-propanesulfonate                     | PFPrS             |
| Potassium perfluoro-1-butanesulfonate                   | PFBS              |
| Sodium perfluoro-1-hexanesulfonate                      | PFHxS             |
| Sodium perfluoro-1-octanesulfonate                      | PFOS              |
| Sodium perfluoro-1-decanesulfonate                      | PFDS              |
| Perfluoro-1-octanesulfonamide                           | FOSA              |
| <i>N</i> -ethylperfluoro-1-octanesulfonamide            | <i>N</i> -EtFOSA  |
| <i>N</i> -ethylperfluoro-1-octanesulfonamidoacetic acid | <i>N</i> -EtFOSAA |
| Perfluoro- <i>n</i> -propanoic acid                     | PFPrA             |
| Perfluoro- <i>n</i> -butanoic acid                      | PFBA              |
| Perfluoro- <i>n</i> -pentanoic acid                     | PFPeA             |
| Perfluoro- <i>n</i> -hexanoic acid                      | PFHxA             |
| Perfluoro- <i>n</i> -heptanoic acid                     | PFHpA             |
| Perfluoro- <i>n</i> -octanoic acid                      | PFOA              |
| Perfluoro- <i>n</i> -nonanoic acid                      | PFNA              |
| Perfluoro- <i>n</i> -decanoic acid                      | PFDA              |
| Perfluoro- <i>n</i> -undecanoic acid                    | PFUnDA            |
| Perfluoro- <i>n</i> -dodecanoic acid                    | PFDoDA            |
| Perfluoro- <i>n</i> -tridecanoic acid                   | PFTrDA            |
| Perfluoro- <i>n</i> -tetradecanoic acid                 | PFTeDA            |
| Perfluoro- <i>n</i> -hexadecanoic acid                  | PFHxDA            |
| Perfluoro- <i>n</i> -octadecanoic acid                  | PFOcDA            |
| 2H-Perfluoro-2-decenoic acid                            | 8:2FTUCA          |
